# Supplementary material for: Telehealth Brief Cognitive Behavioral Therapy for Suicide Prevention: A Randomized Clinical Trial
Source: PubMed Central journal article supplement (PMC11558477; doi:10.1001/jamanetworkopen.2024.45913), 2024-11-12
Supplement: jamanetwopen-e2445913-s001.pdf [file jamanetwopen-e2445913-s001.pdf]

# A randomized clinical trial testing the effectiveness of telemental health for suicidal patients

## 1. Objectives

The **long-term goal** of this study is to reduce suicidal thoughts and behaviors among treatment-seeking individuals who are experiencing suicidal thoughts or have recently made a suicide attempt. Brief cognitive behavioral therapies for suicide prevention (BCBT) has demonstrated empirical support for reducing suicide attempts as compared to treatment as usual (Brown et al., 2005; Rudd et al., 2015; Sinyor et al., 2020). However, no studies to date have assessed their effectiveness when delivered via telehealth, highlighting an important knowledge gap in light of increased use of telehealth subsequent to the outbreak of the novel coronavirus (COVID-19) in the U.S. In light of this knowledge gap, the **primary objective** of this study will be to test the effectiveness of brief cognitive behavioral therapy (BCBT) as compared to present-centered therapy (PCT), an active comparator, for the reduction of suicide ideations and attempts when delivered via telehealth. To accomplish these objectives, we will enroll individual participants who have reported recent suicidal ideation and/or suicidal behaviors. We will utilize self-report and interview methods to compare treatment effects. To achieve our primary objective, we specifically propose to:

**Aim 1: Investigate the efficacy of BCBT-T for the prevention of suicide attempts in a psychiatric outpatient sample.**

H1: Individuals receiving BCBT condition will have significantly reduced suicide ideation and suicide attempt during follow-up as compared to individuals receiving PCT.

**Aim 2: Identify cognitive-affective mediators of BCBT's effects on risk for suicide attempt, when delivered via telehealth.**

H2a: Individuals receiving BCBT condition will show significantly larger improvements in emotion regulation and decision-making style than individuals receiving PCT.

H2b: The effect of BCBT on reduced suicide ideation and attempts will be mediated by improvements in emotion regulation and decision-making style.

H2c: Emotion Artificial Intelligence (AI) will identify recognizable emotional patterns associated with various stages of both psychotherapies as it pertains to participant outcome variables.

## 2. Background and Rationale

Suicide remains one of the top 10 causes of death in the United States. Since 1999, the age-adjusted suicide rate has increased by approximately 33%, from 10.5 per 100,000 in 1999 up to 14.0 per 100,000 in 2017 (Hedegaard, Curtin, & Warner, 2018). Cognitive behavioral therapies are empirically supported for the rapid reduction of suicidal thoughts and behaviors, especially when they are delivered in an individual therapy (versus group therapy) format (Tarrier et al., 2008). One particular protocol—brief cognitive behavioral therapy for suicide prevention (BCBT)—was developed by our research team and tested in a sample of active duty military personnel in a randomized clinical trial. Results of that study showed that service members receiving BCBT were 60% less likely to attempt suicide

42 during the two-year follow-up and showed faster reductions in suicide ideation as compared  
43 to service members receiving treatment as usual (TAU; Rudd et al., 2015). A recently  
44 completed pilot randomized clinical trial similarly found a large reduction in suicide attempt  
45 rates among adolescents and young adults who received BCBT as compared to TAU (0%  
46 vs. 25%; Sinyor et al., 2020).

47 Unfortunately, fewer than half of suicide decedents and individuals with past-year suicide  
48 ideation seek out mental health treatment (Hom, Stanley, & Joiner, 2014). While several  
49 factors influence the decision to use (or not use) mental health services, logistical barriers  
50 such as insufficient time and/or geographic location are among the most commonly cited  
51 reasons for choosing not to access treatment. Telehealth services can address this disparity  
52 due to reduced need for travel and less time away from school and/or work, which can  
53 increase attendance rates to medical appointments (Saeed, Diamond, & Bloch, 2011).  
54 Evidence also suggests that delivering mental health services via telehealth improves help-  
55 seeking behaviors (Kauer, Managan, Sanci, 2014). Although numerous studies indicate that  
56 the efficacy of empirically-supported treatments for a wide range of mental health conditions  
57 are not diminished when delivered via telehealth (e.g., Osenbach et al., 2013; Sloan et al.,  
58 2011), no studies have examined the effects of suicide-focused treatment protocols when  
59 delivered in this format.

60 The present study aims to address this knowledge gap by testing the effectiveness of BCBT  
61 when delivered via telehealth as compared to present-centered therapy (PCT), an active  
62 comparator that has been shown to significantly reduce suicide ideation (Bryan et al. 2016;  
63 Resick et al., 2017). The results of this study would provide critical information about the  
64 effectiveness of BCBT when delivered via telehealth.

## 65 Emotion Analytics in Support of Mental Health Outcomes

66 With the explosion of artificial intelligence (AI) in recent years and the continued  
67 shortage of providers to fill the mental health treatment gap, healthcare has seen a growing  
68 investment in emotion analytics to improve clinical outcomes. The COVID-19 pandemic  
69 further exposed the need for remote patient monitoring, point-of-care diagnosis, and virtual  
70 care. Evidence has come to support the use of machine learning and emotion artificial  
71 intelligence (Emotion AI) to measure, detect, and interpret emotional and behavioral  
72 changes in psychotherapy (Gual-Montolio et al, 2022; Miner et al, 2022; Tanana et al, 2021;  
73 Taubitz et al, 2022); to streamline diagnosis and clinical assessment (De Choudhury et al,  
74 2021; Guntuku et al, 2017; Zhang et al, 2022); and to improve risk prediction models for  
75 suicide prevention (Kusuma et al, 2022; Walsh et al, 2017). Extant literature offers diverse  
76 applications of innovative methods to support long-standing needs, and the merging of  
77 clinical and automated assessments are among these innovations (Henry et al, 2022).  
78

79 Clinical assessments and automated methods have both been found to be effective  
80 approaches in detecting suicidal ideation. Clinical assessments often rely upon self-report  
81 surveys and measurements to identify mental illness and related symptomatology, for  
82 example, risk of harm to self or others. This approach is based upon several assumptions,  
83 including that the person is aware of unfolding thoughts and feelings; that the person will be  
84 able to verbally communicate the experience in varied emotional states; and that the person  
85 will be motivated to answer honestly (Barron, 2021). In contrast, automated methods have  
86 become particularly adept at identifying and diagnosing mental illnesses through the study  
87 of naturally unfolding expressions in textual communications (Chancellor & Choudhury,

2020). Online usage such as social media posts and Google search terms have demonstrated the ability to better predict completed suicides than conventional self-report measures (Ma-Kellams et al, 2015; Ophir et al, 2020), and machine learning models have been found to improve traditional suicide prediction models (Kusuma, 2022).

Diverse treatment modalities including cognitive-behavioral therapy, emotion-focused therapy, and psychodynamic therapy have been shown to facilitate therapeutic change through a reformulation of past emotional memories and transformation of present emotional experience (Greenberg et al, 2007; Lane et al, 2015). Given that emotions play a central role in psychotherapy outcomes, significant consideration must be made to systematically explore patterns of emotional engagement, emotional expression, and emotion regulation in psychotherapy sessions (Sloan and Kring, 2007). Frequently, the study of emotion in psychotherapy has been bound by methodological limitations, as analyses have typically involved human raters and been largely retrospective, time-consuming, and subjective (Tanana et al, 2021). Recent developments in machine learning and natural language processing (NLP) provide an avenue for large-scale, systematic, real-time measurement of emotion in narrative. Cognovi Labs' Emotion AI is a contemporary application of NLP and behavioral psychology.

## Emotion Artificial Intelligence

Cognovi Emotion AI™ is a technology that incorporates a behavioral psychology layer in its machine learning algorithms (Cognovi Labs, 2023). By applying Emotion AI to any textual or transcribed data, a user can obtain the underlying emotions of a given communication. Discrete emotion categories measured by Cognovi Emotion AI™ include joy, anger, disgust, fear, sadness, surprise, amusement, contempt, hope, and trust. While the first six are considered *basic* or *primary emotions* originally set forth by Ekman and Friesen (1971), the latter are *complex* or *secondary emotions* which generally evolve in an interpersonal context and can be heavily impacted by experience, expectations, and biases (Becker-Asano & Wachsmuth, 2008). Contemporary emotion theory underscores the functions served by emotions (Barrett & Salovey, 2002; Frijda, 1994).

By tuning into an individual and a therapeutic dyad's emotional expressions, Emotion AI detects nuanced fluctuations in emotion over time and highlights the arising activation. It identifies critical moments that require further attention, as emotions and action tendencies are intimately intertwined (Lowe & Ziemke, 2011), and combinations of emotions are related to impending actions (Fontaine & Scherer, 2013; Matsumoto et al., 2015). Action tendencies are states of readiness to execute a given action, for example moving closer to an object, connecting with it, interfering with it, or simply observing. Cognovi Labs has mapped 10 emotions onto 10 action tendencies, and organized the action tendencies along broader categories, or Action Personas, that capture their position on a continuum: Withdraw, Consider, Approach, and Tackle.

*Withdraw:* Feeling helpless, powerless, or ineffective, so staying passive, holding back, or pulling away. The person wants nothing to do with someone or something, so withdraws from the situation.

*Consider:* To protect oneself or others, a person pauses to observe or further witness a situation. The person actively contains internal reactions and considers whether or not to engage.

*Approach:* The act of seeking to approach, connect, and stay close to a person, place, or thing. The person feels ready to invest time and resources to understand the options and

139 pursue action.  
140 *Tackle*: Feeling stimulated, motivated, and ready to oppose an obstacle or conquer a  
141 challenge. The person is inclined to antagonize, provoke, or tackle one's goal.  
142

143 Downstream from classifying Action Personas, Cognovi Labs also utilizes two summary  
144 metrics designed to allow for rapid interpretation of isolated emotions: *Emotionality* and  
145 *Intent*. Emotionality represents the proportion of content that contains detected emotions.  
146 Intent describes the level of activation, or the inherent likelihood of action as a consequence  
147 of an underlying emotional state. Secondary outcomes, in part, will focus on evaluating the  
148 ability of Cognovi Emotion AI to identify recognizable emotional patterns associated with  
149 various stages of both BCBT and PCT as it pertains to participant outcomes (i.e.,  
150 discontinuing sessions, progress in therapy, continued suicidal ideation, etc.).  
151

### 152 3. Procedures

#### 153 3.1. Research Design

154 The study includes a two-arm randomized clinical trial of BCBT as compared to PCT. The  
155 primary outcomes will be suicide ideation and attempts during a one-year follow-up period.  
156 Outcomes will be assessed using a combination of interview, self-report data, and natural  
157 language processing of session transcripts.

#### 158 3.2 Sample

159 We plan to enroll 160 adults reporting suicidal ideation with intent to die within the past week  
160 or a suicide attempt within the past month.

#### 161 3.3 Recruitment

162 **3.3.1.** Potential participants will be identified by clinical staff affiliated with the OSU  
163 Harding Hospital and Talbot Hall mental and behavioral health services. Patients with active  
164 suicide ideation or a recent suicide attempt will be referred by clinicians to a member of the  
165 study team to determine their eligibility. Potential participants will be identified through self-  
166 report of suicidal thoughts or behaviors on existing suicide risk screening and assessment  
167 tools currently in use across OSUWMC's mental and behavioral health services.

168 **3.3.2.** We will post advertisements on social media sites (e.g., Facebook, Twitter), online  
169 advertising boards (e.g., Craigslist), in digital and print media (e.g., newspapers,  
170 newsletters, distribution of physical study flyer) within the community.

#### 171 3.4 Eligibility Criteria

172 Our **inclusion criteria** will include the following: (1) 18 years of age or older; (2) a score of 5  
173 or higher on the Scale for Suicide Ideation and/or a suicide attempt within the past month;  
174 (3) ability to understand and speak the English language; (4) ability to complete the informed  
175 consent process; (5) regular access to a stable internet connection; and (6) ownership of an  
176 internet-enable communication device (e.g., computer, tablet, smartphone). Our **exclusion**  
177 **criteria** will include the following: (1) substance use disorder requiring acute medical  
178 management; (2) imminent suicide risk warranting inpatient hospitalization; and (3) impaired  
179 mental status that precludes the ability to provide informed consent (e.g., intoxication,  
180 psychosis, mania).

181 **3.5 Treatment Conditions**

182 In the proposed study, participants will be randomized to receive one of two treatments to be  
 183 delivered via telehealth: brief cognitive behavioral therapy (BCBT) or present-centered  
 184 therapy (PCT). Both treatment conditions will include 12 outpatient individual psychotherapy  
 185 sessions scheduled on a weekly or biweekly basis, with the first session lasting 90 minutes  
 186 and subsequent sessions lasting approximately 60 minutes. Specific procedures and  
 187 components contained within each treatment are summarized below in Table 1.

188 **3.5.1. BCBT** is divided into three phrases. In phase I (5 sessions), the therapist conducts  
 189 a detailed assessment of the patient’s most recent suicidal episode or suicide attempt,  
 190 identifies patient-specific factors that contribute to and maintain suicidal behaviors,  
 191 provides a cognitive-behavioral conceptualization, collaboratively develops a crisis  
 192 response plan, and teaches basic emotion regulation skills such as relaxation and  
 193 mindfulness. In phase II (5 sessions), the therapist applies cognitive strategies to reduce  
 194 beliefs and assumptions that serve as vulnerabilities to suicidal behavior (e.g.,  
 195 hopelessness, perceived burdensomeness, guilt and shame). In phase III (2 sessions), a  
 196 relapse prevention task is conducted, during which patients imagined the circumstances  
 197 of a previous suicidal episodes and the internal experiences associated with this event  
 198 (i.e., thoughts, emotions, physiological responses), and then imagine themselves using  
 199 one or more skills learned in BCBT. Participants then imagine themselves successfully  
 200 resolving hypothetical future crises. Participants must demonstrate the ability to  
 201 successfully complete this task in order to terminate the treatment. Additional sessions  
 202 are conducted until participants demonstrate the ability to complete this task.

203 **3.5.2. PCT** includes (1) psychoeducation about the typical symptoms and features  
 204 associated with suicidal thoughts and behaviors; (2) normalization of symptoms; (3)  
 205 experience of receipt of support and feedback from a licensed professional; and (4)  
 206 positive interpersonal interactions. PCT differs from BCBT in several key ways including  
 207 less structure (i.e., patients are allowed to have more input into PCT session agendas)  
 208 and no systematic training in behavioral or cognitive strategies for managing emotions  
 209 and changing suicide-focused thoughts. PCT will be used as an active comparator  
 210 because it is an empirically supported treatment for depression and PTSD that also  
 211 reduces suicidal ideation (Bryan et al., 2016; Resick et al., 2017), but contains unique  
 212 elements that distinguish the treatment from BCBT (see Table 1).

213 **Table 1. Treatment procedures contained within BCBT and PCT**

214

| Treatment Procedure/Component                            | BCBT | PCT |
|----------------------------------------------------------|------|-----|
| Suicide risk screening                                   | X    | X   |
| Narrative assessment                                     | X    |     |
| Crisis response plan / safety plan                       | X    | X   |
| Means safety counseling                                  | X    | X   |
| Weekly monitoring of suicide risk                        | X    | X   |
| Psychiatric symptom management                           | X    | X   |
| Psychoeducation: suicide as symptom of mental illness    |      | X   |
| Psychoeducation: suicide as a deficit in self-regulation | X    |     |
| Emotion regulation skills training                       | X    |     |
| Cognitive restructuring skills training                  | X    |     |

|                         |   |  |
|-------------------------|---|--|
| Relapse prevention task | X |  |
|-------------------------|---|--|

215  
216  
217  
218  
219  
220  
221  
222  
223  
224  
225  
226  
227  
228  
229  
230  
231  
232  
233  
234  
235  
236  
237  
238  
239  
240  
241  
242  
243  
244  
245  
246  
247  
248  
249  
250  
251  
252  
253  
254  
255  
256  
257  
258  
259  
260

To control for therapist confounding, both BCBT and PCT will be administered by the same research therapists. All BCBT and PCT sessions will be recorded via the Zoom platform to ensure fidelity and to prevent cross-contamination of therapies. Recordings will be reviewed and scored using fidelity monitoring checklists specific to each therapy by the investigators. Research therapists will participated in weekly supervision to receive feedback.

To minimize bias associated with expectancy effects, participants will not be informed about their treatment group assignment. Treatments will instead be referred to as Treatment A and Treatment B.

### 3.6 Clinician Training and Supervision

Research therapists will complete two-day trainings in both therapies (BCBT and PCT) with follow-up consultation and supervision. All therapy sessions will be audio or video recorded, and a random sample will be selected for fidelity monitoring and review by members of the investigative team who are approved trainers and consultants for each procedure. Following each therapy session, clinicians will upload their electronic recording to a shared, access-restricted folder on a secured OSU server. File names will comprise the participant’s ID number, therapist’s initials, and session number (e.g., 3298JB2).

### 3.7 Cognovi Emotion AI procedures

The research study’s psychotherapy session transcripts will undergo emotional analysis in Cognovi Labs' Emotion AI technology. Drs. Nirit Pisano and Ryan Mann will facilitate the transfer of anonymized psychotherapy session transcripts from Ohio State University to Cognovi Labs. No personal identifiable information (PII) will be included in the transfer to maintain the privacy of study participants. As transcripts are received, they will be uploaded into Cognovi’s Explorer technology, which handles large scale data sets and allows for both aggregation and parsing of transcripts. Within the Explorer, communications can be organized and emotions measured along diverse variables, for example by therapist, patient, session number, treatment modality, intervention type, diagnosis, topic of discussion (e.g. suicidality), gender, treatment length, and any other feature of interest. As the data is loaded, automated emotion tagging will assign each sentence with one or more of Cognovi Labs' 10 emotions. Emotion tagging occurs upon entry in real time. Topic clustering will identify emotionally salient issues in a single session or across entire treatments.

Transcripts will also run through Cognovi’s Communicator technology, which allows for more in-depth analysis of a two-person interaction. The therapist-patient dyad can be evaluated as a single unit in order to determine the “emotional journey” of a session, an exchange, or an entire treatment. This will highlight any noteworthy rise or fall in emotional or behavioral metrics. Each speaker’s emotional communication can also be analyzed in terms of what it evokes in the other, revealing a back-and-forth dynamic whereby certain emotions may be mirrored back while others are not.

### 3.7 Randomization

Individuals who meet inclusion criteria will be randomized to either BCBT or PCT using a stratified block randomization algorithm designed to balance participants across both conditions based on the following variables of interest: biological sex (male or female) and

261 history of suicide attempt (no previous attempts, one previous attempt, two or more previous  
262 attempts). To prevent the possibility of staff members manipulating participant assignment to  
263 treatment, a computerized randomization technique will be used.

### 264 **3.8. Blinded Assessments**

265 Follow-up assessments will be conducted by an independent evaluator who is blind to  
266 treatment assignment.

### 267 **3.8 Sample Size Estimation**

268 Previous studies indicate that suicide attempt rates during the first year postbaseline range  
269 from 7-25% among patients receiving CBT and from 20-50% among patients receiving  
270 treatment as usual. The lower bounds of these estimates occurred in a study of active duty  
271 military personnel with a predominantly male sample (Rudd et al., 2015). Follow-up analyses  
272 from that study (Bryan & Rudd, 2018) found higher suicide attempt rates among female  
273 participants in both treatment groups, comparable to the rates reported in other clinical trials  
274 that had majority (or entirely) female participants (Brown et al., 2005; Linehan et al., 2016,  
275 2018). The sample to be enrolled in this study is expected to have a larger proportion of  
276 women than our earlier military study. Across all of these studies, CBT was associated with  
277 a 50% or larger reduction in suicide attempt rates as compared to treatment as usual. BCBT  
278 is also associated with significantly faster reductions in suicide ideation, with statistically  
279 significant and moderate between-group differences typically occurring 3-6 months  
280 postbaseline.

281 We used SAS 9.4 to estimate the minimum required sample  
282 size to detect a statistically significant log-rank test with 80%  
283 power and a two-sided  $\alpha=.05$  under a range of possible  
284 conditions (see Table 2). A total sample size of 160 (80 per  
285 arm) yielded sufficient power to detect a 50% reduction in  
286 suicide attempts when the observed rates were comparable to  
287 those reported in several previously published trials (20% vs.  
288 40%).

289 We used RMASS 2 to estimate the minimum required sample  
290 size to detect a statistically significant between-group difference  
291 in suicide ideation when using a mixed effect model with 5  
292 assessments (baseline, 3 months, 6 months, 9 months, 12  
293 months) and an expected autocorrelational structure with  $r=0.2$   
294 between adjacent measurements. Under these assumptions, a  
295 minimum of 76 participants (38 per arm) is required to detect a small to medium  
296 standardized mean difference ( $d=0.3$ ) between groups. Assuming 20% attrition during  
297 follow-up, the minimum sample size needed to detect this effect size increases only slightly  
298 to 84 participants.

**Table 2. Results of power analyses for a range of suicide attempt rates across BCBT and PCT**

| BCBT | PCT | N   |
|------|-----|-----|
| 10%  | 15% | 444 |
| 10%  | 20% | 140 |
| 10%  | 30% | 50  |
| 10%  | 40% | 30  |
| 15%  | 20% | 696 |
| 15%  | 30% | 102 |
| 15%  | 40% | 42  |
| 20%  | 30% | 256 |
| 20%  | 40% | 80  |

299 **4. Measurement / Instrumentation**

300 The planned assessment schedule for this  
301 study is displayed in Table 3.

302 **4.1. Primary Outcomes: Suicide Ideation &**  
303 **Attempts**

304 **Suicide attempts** will be assessed using the  
305 Self-Injurious Thoughts and Behaviors  
306 Interview-Revised (SITBI-R). The SITBI-R is  
307 an empirically-supported researcher-  
308 administered interview for assessing the  
309 characteristics and features of self-injurious  
310 thoughts and behaviors, and to distinguish  
311 different types of suicidal and self-injurious  
312 behaviors.  
313

314 **Severity of suicide ideation** will be assessed using the Scale for Suicide Ideation (SSI).  
315 The SSI is an empirically-supported researcher-administered interview that assesses the  
316 intensity of suicide-related thoughts, urges, intentions, and behaviors. All participants  
317 complete the first 5 items. If a subject positively endorses either item 4 (active ideation) or  
318 item 5 (passive ideation), they are directed to complete an additional 14 items.  
319

320  
321  
322 **4.2. Secondary Outcomes**  
323  
324

325 **Psychiatric symptom severity** will be measured using the Patient-Reported Outcomes  
326 Measurement Information System (PROMIS). PROMIS is a 43-item self-report measure that  
327 asks participants' health status in the following domains: physical function, anxiety,  
328 depression, fatigue, sleep disturbance, pain interference, and participation in social roles.  
329 Respondents are directed to rate the frequency of each symptom within the past 7 days on  
330 a 5-point scale ranging from 0 (never) to 4 (always).  
331

332 **Suicidogenic beliefs** will be assessed with the Suicide Cognitions Scale-Revised (SCS-R).  
333 The SCS-R is an empirically-supported self-report scale that assesses the strength and  
334 severity of maladaptive beliefs that contribute to suicidal thoughts and behaviors (e.g.,  
335 hopelessness, self-hatred, distress intolerance). Respondents are directed to rate the extent  
336 to which they agree or disagree with a series of 16 statements on a 5-point scale ranging  
337 from 0 (strongly disagree) to 4 (strongly agree).  
338

339 **Decision-making style** will be assessed with the Monetary Choice Questionnaire (MCQ), a  
340 27-item self-administered questionnaire in which the respondent chooses between a  
341 smaller, immediate monetary award and a larger, delayed monetary reward (e.g., "Would  
342 you prefer \$14 today or \$25 in 19 days?"). The method is scored by calculating where the  
343 respondent's answers place him or her relative to reference discounting curves, where  
344 placement among steeper curves indicates higher levels of impulsive decision-making  
345

346 **Emotion regulation** will be assessed with the Difficulties in Emotion Regulation Scale Short  
347 Form (DERS-SF), an 18-item self-report measure that assesses six components of emotion

**Table 3. Planned Assessment Schedule**

| Measure   | BL | Tx | 3 Mo | 6 Mo | 9 Mo | 12 Mo |
|-----------|----|----|------|------|------|-------|
| SITBI-R   |    |    |      |      |      |       |
| SSI       |    |    |      |      |      |       |
| PROMIS-43 |    |    |      |      |      |       |
| SCS-R     |    |    |      |      |      |       |
| CEQ       |    |    |      |      |      |       |
| MCQ       |    |    |      |      |      |       |
| DERS-SF   |    |    |      |      |      |       |
| YSS       |    |    |      |      |      |       |
| PTHI      |    |    |      |      |      |       |
| DIAMOND   |    |    |      |      |      |       |



348 regulation deficits: nonacceptance of emotional responses, difficulties engaging in goal-  
349 directed actions, impulse-control difficulties, lack of emotional awareness, limited access to  
350 emotion regulation strategies, and lack of emotional clarity.

351  
352 **Treatment acceptability and impact** will be assessed using items from the Youth Services  
353 Survey (YSS), a self-report scale that measures a patient's perceptions about mental health  
354 services and treatment, and perceived benefits resulting from the treatment.

355  
356 **Credibility and expectations about treatment** will be assessed using the Credibility  
357 Expectancy Questionnaire (CEQ), a self-report measure typically administered at the  
358 beginning and end of treatment to assess a patient's perceptions about the legitimacy of  
359 each treatment.

360  
361 **Post-treatment follow-on services** will be measured at the follow-up assessments by the  
362 Post-Treatment Health Interview (PTHI). This measure is utilized to assess participants'  
363 engagement in mental health treatment (e.g. inpatient, group, outpatient, medications, etc).

364  
365 **Cognovi Emotion AI.** Situated at the intersection of behavioral psychology and deep  
366 machine learning, Cognovi Emotion AI™ measures and interprets emotional communication  
367 as it is expressed through written or spoken word. The technology was developed over eight  
368 years at Wright State University's KNO.E.SIS Center with funding from the National Science  
369 Foundation, Department of Energy, and US Air Force. Cognovi Labs' emotion algorithms  
370 have been pre-trained on datasets containing tens of millions of examples. In contrast to  
371 tonation or sentiment analysis, Cognovi Labs' Emotion AI was trained to measure emotion in  
372 context. It is therefore able to capture sarcasm, metaphor, humor, speech irregularities, and  
373 other linguistic elements. The technology was trained natively in 20 languages, avoiding  
374 translation and safeguarding the cultural and linguistic differences inherent in diverse  
375 languages. The accuracy of language-specific emotion models are verified with respect to  
376 human annotated benchmarks, based on a majority rule of native speakers.

#### 377 378 **4.3. Covariates**

379  
380 **Psychiatric diagnosis** will be assessed with the Diagnostic Interview for Anxiety, Mood,  
381 and OCD and Related Neuropsychiatric Disorders (DIAMOND), an empirically-supported  
382 structured diagnostic interview that assesses the most common mood, anxiety, and trauma-  
383 related psychiatric disorders to include major depression and suicidality.

### 384 385 **5. Detailed Study Procedures**

386 Patients accessing treatment from an OSUWMC mental or behavioral health service will be  
387 referred to our research staff for eligibility determination if they screen positive for suicidal  
388 ideation or verbally report recent suicidal thoughts and behaviors. Research staff will attend  
389 regularly scheduled clinical team meetings and discharge planning meetings to identify  
390 potential participants. Referred patients will be contacted by a member of the research team  
391 to explain the purpose of the study, study procedures, and possible risks and benefits. All  
392 patients will be contacted using the established study contact script. Interested patients will  
393 then complete an initial screening to determine if they meet eligibility criteria.

394 Patients who are eligible for the study will be informed of their eligibility and complete the  
395 informed consent process. Those who consent to participate will then complete a baseline

396 assessment involving self-report measures and clinician-administered interviews. After  
397 completing the baseline assessment, participants will be randomized to either CBT or PCT  
398 using a computerized randomization procedure that stratifies participants by biological sex  
399 and history of suicide attempts. Participants will then be scheduled for their first treatment  
400 session.

401 Therapy sessions will be scheduled once per week. During the active treatment phase,  
402 participants will complete self-report assessments of suicide ideation and symptom severity  
403 prior to the start of each session. These data will be collected and stored in Redcap, a  
404 secure web-based data collection system designed for clinical trials.

405 Participants will also complete self-report assessments and clinician-administered interviews  
406 3 months, 6 months, 9 months, and 12 months postbaseline. All self-report assessments  
407 used at follow-up will be collected and stored via Redcap, a secure web-based data  
408 collection system designed for clinical trials. Participants will receive a \$50 Amazon.com gift  
409 card for each follow-up assessment they complete. With four follow-up assessments,  
410 participants could therefore receive up to \$200 total in Amazon.com gift cards.

## 411 **5.1 Potential Risks**

### 412 **5.1.1 Emotional discomfort during self-report measures and interviews.**

413 Participants could develop mild to moderate emotional discomfort or frustration  
414 associated with filling out questionnaires and/or answering interview questions that ask  
415 about suicide, psychological symptoms, and other stressful experiences. This potential  
416 risk is expected to be comparable to the discomfort experienced when talking with a  
417 friend or acquaintance about these same topics. If discomfort is experienced, it is not  
418 expected to be severe or to last for more than a few minutes.

419 **5.1.2 Emotional discomfort during treatment.** Participating in mental health treatment  
420 and research might increase some symptoms and increase the risk of feeling  
421 emotionally uncomfortable in the short term, which might increase the desire for suicide  
422 temporarily. This increase is usually not severe, however, and does not last long. Work  
423 with these interventions in previous studies, suggest participants typically experience  
424 *decreased* emotional distress immediately after receiving treatment. It is also possible  
425 that participants might be uncomfortable not knowing the name of the intervention they  
426 have been randomized to, but previous experience studying these interventions suggest  
427 that most participants are generally okay with this lack of knowledge.

428 **5.1.3 Breach of confidentiality.** Participants' confidentiality could be breached if their  
429 identities are inadvertently released or accessed by a third party. Participants could also  
430 be identified based on the content of their responses. This risk is expected to be low  
431 because the data are not stored or analyzed in ways that are likely to reveal a subject's  
432 identity. Breach of confidentiality could also occur if an external party of individual hacks  
433 into Zoom interface during a participant's therapy sessions.

## 434 **5.2 Protections Against Risk**

435 To minimize the risk of emotional discomfort associated with survey questions and  
436 interviews, we will fully describe to participants the nature of study procedures and the  
437 potential for distress will be fully described to subjects before they complete any procedures.

438 Moreover, participants will be reminded that they can choose to discontinue any assessment  
439 at any time if they become severely distressed or stop the interview and take a break.  
440 Research staff are instructed to closely monitor participants while they are completing  
441 assessments.

442  
443 Because we will be recruiting subjects with a history of suicidal thoughts and behaviors, we  
444 expect some subjects to be experiencing elevated emotional distress throughout the  
445 duration of the study. To minimize risk associated with this issue, all participants will receive  
446 either a safety plan or crisis response plan during their first session, consistent with standard  
447 of care recommendations for the management of suicide risk. The investigators will also be  
448 available to meet with distressed participants for additional crisis interventions, where  
449 needed. All follow-up assessments will be conducted by clinical research staff with an  
450 advanced mental health degree (e.g., social work, clinical psychology) and previous  
451 experience working with acutely suicidal patients, to include conducting suicide risk  
452 assessments and crisis interventions over the phone and via telehealth platforms.

453  
454 The PI has independently conducted multiple studies with acutely suicidal individuals, and  
455 has considerable experience managing suicide risk. If a participant reports suicide ideation,  
456 or a research staff member becomes aware that the participant is at imminent risk to harm  
457 himself/herself, the following questions will be asked to clarify the nature of risk (and to  
458 identify those at imminent risk requiring consideration for hospitalization):

- 459  
460 (1) Do you have a plan for killing yourself and do you intend to act on the plan?  
461 (2) Do you have a desire to kill yourself that you believe you might act on?  
462 (3) Have you already taken steps to act on your plan? If so, what steps have you taken?

463  
464 Positive endorsement of any of the above items will be considered for potential  
465 hospitalization with additional assessment to be conducted by the research therapist. The  
466 research therapist will weigh all clinical indicators of risk and will make a clinical  
467 determination for hospitalization if warranted.

468  
469 It is also possible for subjects to be identified as imminent risk if they indicate a moderate to  
470 severe level of suicide intent on the Beck Scale for Suicide Ideation (a score of 2 on Item 4),  
471 requiring evaluation for possible hospitalization. Once a participant is identified as potentially  
472 imminent risk, the researcher will conduct a more thorough assessment for possible  
473 hospitalization. If hospitalization is not indicated, the research clinician will review with the  
474 participant the steps contained within their crisis response plan / safety plan, a risk  
475 management procedure contained within each treatment group.

476  
477 To minimize the risk of confidentiality breach, research staff will receive rigorous training in  
478 confidentiality and privacy procedures. Subject identifiers (e.g., name, date of birth, etc.) will  
479 also be stored separate from their data.

480 Coded audio/video recordings, transcripts, and other metadata associated with the  
481 recordings which will be utilized for the purposes of data analyses and fidelity monitoring will  
482 be stored by subject ID on HIPAA compliant servers.

483  
484

485  
486 Identifiable data will be destroyed upon the completion of the study. We will use recommended  
487 security procedures and strategies for maximizing confidentiality and minimizing the risk of  
488 third-party intrusion during Zoom-based research activities. Subject data will be tracked  
489 using a sequential numeric ID system generated for each subject (e.g., 1001, 1002,  
490 1003...). Finally, data will be stored in a deidentified manner using subject IDs instead of  
491 potential identifiers. De-identified transcripts (i.e., transcripts with identifying data such as  
492 name, date of birth, etc. removed using the Safe Harbor method) will additionally be stored  
493 by subject ID number. Only de-identified data may be shared with researchers on an  
494 individual basis. At the conclusion of the study, all identifiable data to include video  
495 recordings will be destroyed. De-identified transcripts will be maintained after the completion  
496 of the study. De-identified transcripts may be shared with external collaborators via  
497 approved methods after agreements created by the OSU Technology Commercialization  
498 Office (TCO) are finalized.

## 499 500 **6. Data Analysis**

501  
502 Prior to statistical analyses, the data will be screened to assess the need for scale  
503 transformations (e.g., log, reciprocal) to normalize distributions or reduce variance  
504 heterogeneity. The study design is a two-arm randomized clinical trial with a superiority  
505 hypothesis (i.e., BCBT superior to PCT). Analyses will use survival analysis and mixed effects  
506 regression with repeated measures. Most participants will have 5 post-intervention assessments  
507 (baseline, 3 months, 6 months, 9 months, 12 months). Follow-up assessment data will be  
508 collected from participants, via electronically delivered links to the participants email via Redcap,  
509 even if they drop out of therapy early. The primary focus will be on overall group differences  
510 over time. Separate univariate analyses will be conducted with each primary outcome variable  
511 at unadjusted, two-tailed  $\alpha=.05$ . Little's MCAR test will be used to determine if data are  
512 missing at random, and random effects pattern-mixture modeling will be used to determine if  
513 missingness influences longitudinal results. If data are not missing at random, we will use full  
514 information maximum likelihood estimation. The principal statistical software to be used is SAS  
515 9.4 supplemented with other statistical software such as SPSS.

516  
517 **6.1 Hypothesis 1:** Individuals receiving BCBT condition will have significantly reduced  
518 suicide ideation and suicide attempt during follow-up as compared to individuals receiving  
519 PCT.

520  
521 We will analyze follow-up suicide attempt data using survival analysis with time-to-event  
522 data. The overall test of differences between the two intervention groups will be  
523 accomplished using the hazard ratio derived from the Cox regression and the log-rank  
524 and Wilcoxon statistics derived using the Kaplan-Meier method. Proportional hazard  
525 survival regression will also be used to explore between-group differences using  
526 demographic and baseline characteristics as covariates.

527  
528 **6.2 Hypothesis 2a:** Individuals receiving BCBT condition will show significantly larger  
529 improvements in emotion regulation and decision-making style than individuals receiving  
530 PCT.

531 To test differences in continuous outcomes between groups over time, mixed effects  
532 regression models with repeated measures will be used. Treatment group will be the primary  
533 independent variable, and outcome measures at baseline and each follow-up assessment  
534 period will be entered as dependent variables. Covariance structures will be selected by  
535 comparison of likelihood criteria (e.g., Akaike's Information Criteria), though the  
536 autoregressive structure is well-suited for such analyses.

537  
538 **6.3 Hypothesis 2b:** The effect of BCBT on reduced suicide attempts will be mediated by  
539 improvements in emotion regulation and decision-making style.

540

541 **Figure 1.**  
542 **The statistical mediation model**

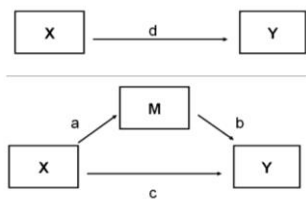

543 Figure 1 depicts statistical mediation as originally described  
544 by Baron & Kenny. The top panel shows a direct effect of  
545 variable X on Y, quantified by a single regression coefficient  
546 (d). The bottom panel depicts statistical mediation, the  
547 indirect effect of X on Y. In this model, the mediator (M) is a  
548 cause of Y, and a change in X causes change in the  
549 mediator. In this project, the causal variable (X) is  
550 intervention group. The mediator variables (M) are emotion  
551 regulation (measured with the DERS-SF), and decision-

552 making style (measured with the MCQ). The mediation path is the product of coefficients a  
553 and b in the lower panel, so a statistical test of this multiplicative path a\*b is a test of the  
554 significance of mediation. We will use regression parameters and their standard errors with  
555 10,000 bootstrapped resamples as recommended by Preacher and Hayes to accomplish  
556 this analysis.

557 **6.4 Hypothesis 2c:** Data analysis will reveal the volume of overall communication, degree of  
558 emotional expression (Emotionality), extent of activation (Intent), and level of Action  
559 Personas (Withdraw, Consider, Approach, or Tackle). For example, high levels of anger,  
560 contempt, and amusement often lead to a more confrontational stance and therefore higher  
561 tackle, while significant joy, hope, and trust reflect an inclination to embrace, suggesting a  
562 readiness to approach. Emotional shifts throughout the transcript will lead to fluctuating  
563 metrics that will be assessed in regard to predefined variables.

564 We intend to utilize a nonexperimental quantitative design to investigate the underlying  
565 emotional patterns associated with each subject. Emotional patterns are to be established  
566 by our algorithm, Cognovi's Emotion AI™. Each emotional pattern will be calculated at both  
567 individual and group levels. Cognovi's Emotion AI™ provides quantitative metrics as  
568 previously set forth. These metrics will serve as baseline indicators for emotional patterns.  
569 The quantitative outputs will be statistically analyzed for outliers, trends, and anomalies  
570 using R statistical software (R Core Team, 2022). R is a commonly used statistical  
571 programming language that is open source and freely available (Mann, 2020).

572 Statistical analyses for this research will include two primary phases. The first phase is to  
573 test the hypothesis that there is an identifiable emotional pattern associated with various  
574 stages of therapy as it pertains to patient outcome (i.e., discontinuing sessions, progress,  
575 continued suicidal ideation etc.). This hypothesis will be tested using outlier, trend, and  
576 anomaly detection methods. The specific method of choice is dependent upon data  
577 distribution (Aggarwal, 2016). Initially, we will be investigating the data for similarity in

578 emotional patterns for subjects that experienced the same or similar therapy outcome.  
579 Therapy outcome will serve as a labeled data set used to test predictive validity.

580  
581 The second phase is to test predictive validity. We will apply multiple unsupervised machine  
582 learning classification algorithms to a partitioned dataset for model construction. These  
583 include random forest, naive bayes, logistic regression, and support vector machine (SVM)  
584 algorithms. The models will be optimized using this data (training set). Predictive validity will  
585 be determined by applying the highest performing model, as determined by accuracy,  
586 precision, recall, and F1 scores on the training set, to a holdout data set (test set) and  
587 inspection of the same key performance metrics. This process will be iteratively applied to  
588 each category of labeled data.  
589

## 590 7. Bibliography

591 Aggarwal, C. C. (2016). *Outlier analysis* (2nd ed.). Springer.

592  
593 Barrett, L. F., & Salovey, P. (Eds.). (2002). *The wisdom in feeling: Processes underlying*  
594 *emotional intelligence*. New York: Guilford.

595  
596 Becker-Asano, C., & Wachsmuth, I. (2008). Affect simulation with primary and secondary  
597 emotions. *Intelligent Virtual Agents*, 15-28. [https://doi.org/10.1007/978-3-540-85483-8\\_2](https://doi.org/10.1007/978-3-540-85483-8_2)

598  
599 Brown, G. K., Ten Have, T., Henriques, G. R., Xie, S. X., Hollander, J. E., & Beck, A. T. (2005).  
600 Cognitive therapy for the prevention of suicide attempts: a randomized controlled trial. *Jama*,  
601 294(5), 563-570.

602 Bryan, C. J., Clemans, T. A., Hernandez, A. M., Mintz, J., Peterson, A. L., Yarvis, J. S., ... &  
603 STRONG STAR Consortium. (2016). Evaluating potential iatrogenic suicide risk in trauma-  
604 focused group cognitive behavioral therapy for the treatment of PTSD in active duty military  
605 personnel. *Depression and anxiety*, 33(6), 549-557. Chancellor, S., & De Choudhury, M. (2020).  
606 Methods in predictive techniques for mental health  
607 status on social media: A critical review. *Digital Medicine*, 3(1).  
608 <https://doi.org/10.1038/s41746-020-0233-7>

609 De Choudhury, M., Gamon, M., Counts, S., & Horvitz, E. (2021). Predicting depression via  
610 social media. *Proceedings of the International AAI Conference on Web and Social*  
611 *Media*, 7(1), 128-137. <https://doi.org/10.1609/icwsm.v7i1.14432>

612  
613 Ekman, P., Friesen, W. V., & Tomkins, S. S. (1971). Facial affect scoring technique: A first  
614 validity study. *Semiotica*, 3(1), 37-58. <https://doi.org/10.1515/semi.1971.3.1.37>

615  
616 Fontaine, J. J. R., & Scherer, K. R. (2013). Emotion is for doing: The Action tendency  
617 component. In J. J. R. Fontaine, K. R. Scherer, & C. Soriano (Eds.), *Components of*  
618 *emotional meaning: A sourcebook* (pp. 170–185). Oxford University Press.

619  
620 Frijda, N. H. (1994). Emotions are functional, most of the time. In *The nature of emotion:*  
621 *Fundamental questions*. Oxford University Press.

622  
623 Greenberg, L. S., Ausra, L., & Herrmann, I. R. (2007). The relationship among emotional  
624 productivity, emotional arousal and outcome in experiential therapy of depression.  
625 *Psychotherapy Research*, 17(4), 482-493. <https://doi.org/10.1080/10503300600977800>

626  
627 Gual-Montolio, P., Jaén, I., Martínez-Borba, V., Castilla, D., & Suso-Ribera, C. (2022). Using  
628 artificial intelligence to enhance ongoing psychological interventions for emotional  
629 problems in real- or close to real-time: A systematic review. *International Journal of*  
630 *Environmental Research and Public Health*, 19(13), 7737.  
631 <https://doi.org/10.3390/ijerph19137737>  
632  
633 Guntuku, S. C., Yaden, D. B., Kern, M. L., Ungar, L. H., & Eichstaedt, J. C. (2017). Detecting  
634 depression and mental illness on social media: An integrative review. *Current Opinion in*  
635 *Behavioral Sciences*, 18, 43-49. <https://doi.org/10.1016/j.cobeha.2017.07.005>  
636  
637 Henry, K. E., Kornfield, R., Sridharan, A., Linton, R. C., Groh, C., Wang, T., Wu, A., Mutlu, B.,  
638 & Saria, S. (2022). Human-machine teaming is key to AI adoption: Clinicians'  
639 experiences with a deployed machine learning system. *Digital Medicine*, 5(1).  
640 <https://doi.org/10.1038/s41746-022-00597-7>  
641  
642 Hedegaard, H., Curtin, S. C., & Warner, M. (2018). Suicide rates in the United States continue  
643 to increase. US Department of Health and Human Services, Centers for Disease Control and  
644 Prevention, National Center for Health Statistics.  
645  
646 Kauer, S. D., Mangan, C., & Sancu, L. (2014). Do online mental health services improve help-  
647 seeking for young people? A systematic review. *Journal of Medical Internet Research*, 16(3),  
e66.  
648  
649 Kusuma, K., Larsen, M., Quiroz, J. C., Gillies, M., Burnett, A., Qian, J., & Torok, M. (2022).  
650 The performance of machine learning models in predicting suicidal ideation, attempts,  
651 12 and deaths: A meta-analysis and systematic review. *Journal of Psychiatric Research*, 155,  
652 579-588. <https://doi.org/10.1016/j.jpsychires.2022.09.050>  
653  
654 Lane, R. D., Ryan, L., Nadel, L., & Greenberg, L. (2014). Memory reconsolidation, emotional  
655 arousal, and the process of change in psychotherapy: New insights from brain science.  
656 *Behavioral and Brain Sciences*, 38. <https://doi.org/10.1017/s0140525x14000041>  
657  
658 Lowe, R., & Ziemke, T. (2011). The feeling of action tendencies: On the emotional regulation of  
659 goal-directed behavior. *Frontiers in Psychology*, 2.  
660 <https://doi.org/10.3389/fpsyg.2011.00346>  
661  
662 Ma-Kellams, C., Or, F., Baek, J. H., & Kawachi, I. (2015). Rethinking suicide surveillance.  
663 *Clinical Psychological Science*, 4(3), 480-484.  
664 <https://doi.org/10.1177/2167702615593475>  
665  
666 Mann, R. E. (2020). Use of machine learning to predict ethical drift in law enforcement (9598)  
667 [Doctoral dissertation]. Walden Dissertations and Doctoral Studies.  
668  
669 Matsumoto, D., Frank, M. G., & Hwang, H. C. (2015). The role of intergroup emotions in  
670 political violence. *Current Directions in Psychological Science*, 24(5), 369-373.  
671 <https://doi.org/10.1177/0963721415595023>  
672  
673 Miner, A. S., Fleming, S. L., Haque, A., Fries, J. A., Althoff, T., Wilfley, D. E., Agras, W. S.,  
Milstein, A., Hancock, J., Asch, S. M., Stirman, S. W., Arnow, B. A., & Shah, N. H.

674 (2022). A computational approach to measure the linguistic characteristics of psychotherapy  
675 timing, responsiveness, and consistency. *Mental Health Research*, 1(1).  
676 <https://doi.org/10.1038/s44184-022-00020-9>  
677

678 Ophir, Y., Tikochinski, R., Asterhan, C., Sisso, I., & Reichart, R. (2020). Deep neural networks  
679 detect suicide risk from textual Facebook posts. *Scientific Reports*, 10(1).  
680 <https://doi.org/10.31234/osf.io/k47hr>  
681

682 Osenbach, J. E., O'Brien, K. M., Mishkind, M., & Smolenski, D. J. (2013). Synchronous  
683 telehealth technologies in psychotherapy for depression: A meta-analysis. *Depression and*  
684 *Anxiety*, 30(11), 1058-1067.

685 R Core Team (2022). R: A language and environment for statistical computing. R Foundation for  
686 Statistical Computing, Vienna, Austria. URL <https://www.R-project.org/>  
687

688 Resick, P. A., Wachen, J. S., Dondanville, K. A., Pruiksma, K. E., Yarvis, J. S., Peterson, A. L.,  
689 ... & Litz, B. T. (2017). Effect of group vs individual cognitive processing therapy in active-duty  
690 military seeking treatment for posttraumatic stress disorder: A randomized clinical trial. *JAMA*  
691 *psychiatry*, 74(1), 28-36.

692 Rudd, M. D., Bryan, C. J., Wertenberger, E. G., Peterson, A. L., Young-McCaughan, S., Mintz,  
693 J., ... & Wilkinson, E. (2015). Brief cognitive-behavioral therapy effects on post-treatment suicide  
694 attempts in a military sample: results of a randomized clinical trial with 2-year follow-up.  
695 *American journal of psychiatry*, 172(5), 441-449.

696 Saeed, S. A., Diamond, J., & Bloch, R. M. (2011). Use of telepsychiatry to improve care for  
697 people with mental illness in rural North Carolina. *NC Med J*, 72(3), 219-222.

698 Sinyor, M., Williams, M., Mitchell, R., Zaheer, R., Bryan, C. J., Schaffer, A., ... & Selchen, S.  
699 (2020). Cognitive behavioral therapy for suicide prevention in youth admitted to hospital  
700 following an episode of self-harm: a pilot randomized controlled trial. *Journal of affective*  
701 *disorders*, 266, 686-694.

702 Sloan, D. M., Gallagher, M. W., Feinstein, B. A., Lee, D. J., & Pruneau, G. M. (2011). Efficacy of  
703 telehealth treatments for posttraumatic stress-related symptoms: A meta-analysis. *Cognitive*  
704 *Behaviour Therapy*, 40(2), 111-125.

705 Sloan, D. M., & Kring, A. M. (2007). Measuring changes in emotion during psychotherapy:  
706 Conceptual and methodological issues. *Clinical Psychology: Science and Practice*, 14(4),  
707 307-322. <https://doi.org/10.1111/j.1468-2850.2007.00092.x>  
708

709 Stanley, I. H., Hom, M. A., & Joiner, T. E. (2015). Mental health service use among adults with  
710 suicide ideation, plans, or attempts: results from a national survey. *Psychiatric services*, 66(12),  
711 1296-1302.

712 Tanana, M. J., Soma, C. S., Kuo, P. B., Bertagnolli, N. M., Dembe, A., Pace, B. T., Srikumar, V.,  
713 Atkins, D. C., & Imel, Z. E. (2021). How do you feel? Using natural language processing  
714 to automatically rate emotion in psychotherapy. *Behavior Research Methods*, 53(5),  
715 2069-2082. <https://doi.org/10.3758/s13428-020-01531-z>  
716

716 Tarrier, N., Taylor, K., & Gooding, P. (2008). Cognitive-behavioral interventions to reduce  
717 suicide behavior: a systematic review and meta-analysis. *Behavior modification*, 32(1), 77-108.



718 Taubitz, F., Büdenbender, B., & Alpers, G. W. (2022). What the future holds: Machine learning  
719 to predict success in psychotherapy. *Behaviour Research and Therapy*, 156, 104116.  
720 <https://doi.org/10.1016/j.brat.2022.104116>

721  
722 Walsh, C. G., Ribeiro, J. D., & Franklin, J. C. (2017). Predicting risk of suicide attempts over  
723 time through machine learning. *Clinical Psychological Science*, 5(3), 457-469.  
724 <https://doi.org/10.1177/2167702617691560>

725  
726 Zhang, T., Schoene, A. M., Ji, S., & Ananiadou, S. (2022). Natural language processing applied  
727 to mental illness detection: A narrative review. *Digital Medicine*, 5(1).  
728 <https://doi.org/10.1038/s41746-022-00589-7>

729

730
